# Supplementary material
Source: publisher figshare collection journal article supplement (https://sage.figshare.com/ndownloader/files/36009524)
Supplement: Supplementary file 1 [file 36009524]

| **Sex: Male** | | **Total Instances Observed** | | | **Incidence Range** | | |
| --- | --- | --- | --- | --- | --- | --- | --- |
| **Tissue** | **Observation** | **Cambodian** | **Chinese** | **Vietnamese** | **Cambodian** | **Chinese** | **Vietnamese** |
| Cavity, Thoracic | Adhesion/Inflammation/Fibrosis | - | 5 (83.33%), N=6 | - | - | [0-25.00%] | - |
| Inflammation | 1 (100%), N=1 | - | - | [0-16.67%] | - | - |
| Dorsal Root Ganglia | Degeneration/Necrosis (Neuronal) | 3 (27.27%), N=11 | 4 (16%), N=25 | - | [0-75.00%] | [0-60.00%] | - |
| Infiltrate, (Mononuclear Cell) | - | 3 (12%), N=25 | - | - | [0-33.33%] | - |
| Vacuolation (Neuronal) | - | 3 (12%), N=25 | - | - | [0-60.00%] | - |
| Lacrimal Glands | Infiltrate, (Mononuclear Cell) | 3 (15%), N=20 | 2 (15.38%), N=13 | 1 (14.29%), N=7 | [0-25.00%] | [0-33.33%] | [0-11.11%] |
| Nasal Cavity | Erosion/Ulcer | 1 (7.14%), N=14 | - | - | [0-25.00%] | - | - |
| Hyperkeratosis | 3 (21.43%), N=14 | - | - | [0-75.00%] | - | - |
| Hyperostosis | 1 (7.14%), N=14 | - | - | [0-25.00%] | - | - |
| Infiltrate, (Mononuclear Cell) | 3 (21.43%), N=14 | - | - | [0-75.00%] | - | - |
| Inflammation | 4 (28.57%), N=14 | - | - | [0-100.00%] | - | - |
| Tonsils | Exudate | - | 3 (23.08%), N=13 | - | - | [0-75.00%] | - |
| Inflammation | - | 1 (7.69%), N=13 | - | - | [0-16.67%] | - |

| **Sex: Female** | | **Total Instances Observed** | | | **Incidence Range** | | |
| --- | --- | --- | --- | --- | --- | --- | --- |
| **Tissue** | **Observation** | **Cambodian** | **Chinese** | **Vietnamese** | **Cambodian** | **Chinese** | **Vietnamese** |
| Cavity, Thoracic | Adhesion/Inflammation/Fibrosis | - | 4 (44.44%), N=9 | - | - | [0-25.00%] | - |
| Bacteria | - | 1 (11.11%), N=9 | - | - | [0-16.67%] | - |
| Foreign Material | - | 1 (11.11%), N=9 | - | - | [0-16.67%] | - |
| Hemorrhage | - | 1 (11.11%), N=9 | - | - | [0-16.67%] | - |
| Inflammation | - | 1 (11.11%), N=9 | - | - | [0-16.67%] | - |
| Dorsal Root Ganglia | Degeneration/Necrosis (Neuronal) | 2 (15.38%), N=13 | 3 (13.64%), N=22 | - | [0-50.00%] | [0-60.00%] | - |
| Degeneration/Necrosis | - | 1 (4.55%), N=22 | - | - | [0-16.67%] | - |
| Infiltrate, (Mononuclear Cell) | 1 (7.69%), N=13 | - | - | [0-25.00%] | - | - |
| Mineralization | 1 (7.69%), N=13 | - | - | [0-25.00%] | - | - |
| Vacuolation (Neuronal) | 2 (15.38%), N=13 | 3 (13.64%), N=22 | - | [0-50.00%] | [0-60.00%] | - |
| Foot/Feet | Abscess | - | 1 (100%), N=1 | - | - | [0-14.29%] | - |
| Lacrimal Glands | Infiltrate, (Mononuclear Cell) | 2 (10%), N=20 | 5 (38.46%), N=13 | - | [0-25.00%] | [0-100.00%] | - |
| Mediastinum/Pleura | Adhesion/Inflammation/Fibrosis | - | 2 (50%), N=4 | - | - | [0-100.00%] | - |
| Fibrosis | - | 2 (50%), N=4 | - | - | [0-33.33%] | - |
| Nasal Cavity | Hyperkeratosis | 3 (25%), N=12 | - | - | [0-75.00%] | - | - |
| Infiltrate, (Mononuclear Cell) | 3 (25%), N=12 | - | - | [0-75.00%] | - | - |
| Inflammation | 4 (33.33%), N=12 | - | - | [0-100.00%] | - | - |
| Tail | Cyst | - | 1 (14.29%), N=7 | - | - | [0-20.00%] | - |
| Erosion/Ulcer | - | 2 (28.57%), N=7 | - | - | [0-25.00%] | - |
| Exudate | - | 1 (14.29%), N=7 | - | - | [0-14.29%] | - |
| Infiltrate, (Mononuclear Cell) | - | 1 (14.29%), N=7 | - | - | [0-25.00%] | - |
| Inflammation | - | 2 (28.57%), N=7 | - | - | [0-25.00%] | - |
| Tonsils | Exudate | - | 1 (10%), N=10 | - | - | [0-25.00%] | - |
